# Supplementary material for: Use of Cefiderocol in Adult Patients: Descriptive Analysis from a Prospective, Multicenter, Cohort Study
Source: Springer Nature journal article supplement (doi:10.1007/s40121-024-01016-y), 2024-07-12
Supplement: MOESM1 [file 40121_2024_1016_MOESM1_ESM.pdf]

**Use of cefiderocol in adult patients:  
descriptive analysis from a prospective, multicenter, cohort study**

Daniele Roberto Giacobbe<sup>1,2\*</sup>, Laura Labate<sup>1</sup>, Chiara Russo Artimagnella<sup>1,2</sup>, Cristina Marelli<sup>2</sup>, Alessio Signori<sup>3</sup>, Vincenzo Di Pilato<sup>4</sup>, Chiara Aldieri<sup>5</sup>, Alessandra Bandera<sup>6,7</sup>, Federica Briano<sup>8</sup>, Bruno Cacopardo<sup>9</sup>, Alessandra Calabresi<sup>10</sup>, Federico Capra Marzani<sup>11</sup>, Anna Carretta<sup>12</sup>, Annamaria Cattelan<sup>13</sup>, Luca Ceccarelli<sup>14,15</sup>, Giovanni Cenderello<sup>16</sup>, Silvia Corcione<sup>17,18</sup>, Andrea Cortegiani<sup>19,20</sup>, Rosario Cultrera<sup>21,22</sup>, Francesco Giuseppe De Rosa<sup>17</sup>, Valerio Del Bono<sup>5</sup>, Filippo Del Puente<sup>23</sup>, Chiara Fanelli<sup>24</sup>, Fiorenza Fava<sup>25</sup>, Daniela Francisci<sup>26</sup>, Nicholas Geremia<sup>27,28</sup>, Lucia Graziani<sup>29</sup>, Andrea Lombardi<sup>6,7</sup>, Angela Raffaella Losito<sup>30</sup>, Ivana Maida<sup>24</sup>, Andrea Marino<sup>9</sup>, Maria Mazzitelli<sup>13</sup>, Marco Merli<sup>31</sup>, Roberta Monardo<sup>32,33</sup>, Alessandra Mularoni<sup>34</sup>, Chiara Oltolini<sup>31</sup>, Carlo Pallotto<sup>26</sup>, Emanuele Pontali<sup>23</sup>, Francesca Raffaelli<sup>30</sup>, Matteo Rinaldi<sup>14,15</sup>, Marco Ripa<sup>32,33</sup>, Teresa Antonia Santantonio<sup>12</sup>, Francesco Saverio Serino<sup>35</sup>, Michele Spinicci<sup>29,36</sup>, Carlo Torti<sup>30,37</sup>, Enrico Maria Treçarichi<sup>38,39</sup>, Mario Tumbarello<sup>40,41</sup>, Malgorzata Mikulska<sup>1,2</sup>, Mauro Giacomini<sup>42</sup>, Anna Marchese<sup>4,43</sup>, Antonio Vena<sup>1,2</sup>, Matteo Bassetti<sup>1,2</sup>; on behalf of CEFI-SITA investigators

**CEFI-SITA investigators (collaborators):** Ylenia Murgia; Gabriele Di Meco; Alice Cappello; Sabrina Guastavino; Cristina Campi; Michele Piana; Sara Mora; Nicola Rosso; Antonio Di Biagio; Giulia Viglietti; Iole Brunetti; Chiara Robba; Lorenzo Ball; Denise Battaglini; Federica Portunato; Maddalena Giannella; Pierluigi Viale; Giulia Viero; Cecilia Azzarà; Alessandro Bartoloni; Benedetta Casciato; Chiara Grillo; Donatella Cibelli; Silvia Boni; Marcello Feasi; Paola Del Giacomo; Gianmaria Baldin; Federico D'Amico; Giovanna Travi; Teresa Fasciana; Giulia Catalisano; Antonino Giarratano; Elena Baranello; Margherita Albagini; Chiara Maci; Antonella Castagna; Cecilia Grosso; Nour Shbaklo; Elena Momesso; Nicoletta Boffa; Elena Potenza; Vincenzo Scaglione; Daniele Mengato; Alessandro Russo; Ludovica Corsello; Francesca Serapide; Monica Rizzo; Erika Asperges; Francesco Truffelli; Margherita Sambo; Gabriele Giuliano; Francesco Fele; Chiara Gullotta; Edoardo Campanella; Maria Chiara Meloni; Sabrina Boraso; Sandro Panese; Aurora Bonazza; Kristian Scolz; Erika Coppo; Marco Berruti.

<sup>1</sup> Department of Health Sciences (DISSAL), University of Genoa, Genoa, Italy

<sup>2</sup> Clinica Malattie Infettive, IRCCS Ospedale Policlinico San Martino, Genoa, Italy

<sup>3</sup> Section of Biostatistics, Department of Health Sciences (DISSAL), University of Genoa, Genoa, Italy

<sup>4</sup> Department of Surgical Sciences and Integrated Diagnostics (DISC), University of Genoa, Genoa, Italy

<sup>5</sup> Infectious Diseases Unit, S. Croce e Carle Hospital, Cuneo, Italy

<sup>6</sup> Department of Pathophysiology and Transplantation, University of Milano, Milano, Italy

- <sup>7</sup> Infectious Diseases Unit, IRCCS Ca' Granda Ospedale Maggiore Policlinico Foundation, Milano, Italy
- <sup>8</sup> SC Malattie Infettive e Tropicali, Ospedale San Paolo Savona, Savona, Italy
- <sup>9</sup> Department of Clinical and Experimental Medicine, Unit of Infectious Diseases, ARNAS Garibaldi Hospital, University of Catania, Catania, Italy
- <sup>10</sup> AOU SS Antonio, Biagio e Cesare Arrigo di Alessandria
- <sup>11</sup> SC AR1-Terapia Intensiva Generale, Fondazione IRCCS Policlinico San Matteo, Pavia, Italy
- <sup>12</sup> Department of Medical and Surgical Sciences, Infectious Diseases Unit, University of Foggia, Foggia, Italy
- <sup>13</sup> Infectious and Tropical Diseases Unit, Padua University Hospital, Padua, Italy
- <sup>14</sup> Department of Medical and Surgical Sciences, Alma Mater Studiorum, University of Bologna, Bologna, Italy
- <sup>15</sup> Department of Integrated Management of Infectious Risk, IRCCS Azienda Ospedaliero-Universitaria di Bologna, Policlinico Sant'Orsola, Bologna, Italy
- <sup>16</sup> Department of Infectious Diseases, Sanremo Hospital, Sanremo, Italy
- <sup>17</sup> Department of Medical Sciences, Infectious Diseases, University of Turin, Turin, Italy
- <sup>18</sup> Tufts University School of Medicine, Boston, MA, USA
- <sup>19</sup> Department of Precision Medicine in Medical, Surgical and Critical Care (Me.Pre.C.C.), University of Palermo, Palermo, Italy
- <sup>20</sup> Department of Anesthesia, Analgesia, Intensive Care and Emergency, University Hospital Policlinico Paolo Giaccone, Palermo, Italy
- <sup>21</sup> Department of Translational Medicine, University of Ferrara, Ferrara, Italy
- <sup>22</sup> Infectious Diseases, Azienda Unità Sanitaria Locale of Ferrara, Ferrara, Italy
- <sup>23</sup> Department of Infectious Diseases, Galliera Hospital, Genoa, Italy
- <sup>24</sup> Department of Medicine, Surgery and Pharmacy, University of Sassari, Sassari, Italy
- <sup>25</sup> Anestesia e Terapia Intensiva Cardiotoracica, Fondazione IRCCS Policlinico San Matteo, Pavia, Italy
- <sup>26</sup> Infectious Diseases Clinic, Santa Maria della Misericordia Hospital, Department of Medicine, University of Perugia, Perugia
- <sup>27</sup> Unit of Infectious Diseases, Department of Clinical Medicine, Ospedale "dell'Angelo", Venice
- <sup>28</sup> Unit of Infectious Diseases, Department of Clinical Medicine, Ospedale Civile "S.S. Giovanni e Paolo", Venice
- <sup>29</sup> Department of Experimental and Clinical Medicine, University of Florence, Florence, Italy
- <sup>30</sup> Fondazione Policlinico Universitario Agostino Gemelli IRCCS, Dipartimento di Scienze Mediche e Chirurgiche, UOC Malattie Infettive, Rome, Italy
- <sup>31</sup> ASST Grande Ospedale Metropolitano Niguarda, Milan, Italy
- <sup>32</sup> Università Vita-Salute San Raffaele, Milan, Italy
- <sup>33</sup> IRCCS San Raffaele Scientific Institute, Department of Infectious Diseases, Milan, Italy
- <sup>34</sup> IRCCS-ISMETT, Palermo, Italy
- <sup>35</sup> Azienda ULSS4 Veneto Orientale, UOS Malattie Infettive, UOC Medicina Generale Portogruaro, Italy
- <sup>36</sup> Infectious and Tropical Diseases Unit, Careggi University Hospital, Florence, Italy
- <sup>37</sup> Università Cattolica del Sacro Cuore, Dipartimento di Sicurezza e Bioetica, Sez. Malattie Infettive, Rome, Italy
- <sup>38</sup> Department of Medical and Surgical Sciences, University "Magna Graecia", Catanzaro, Italy
- <sup>39</sup> "R. Dulbecco" Teaching Hospital, Catanzaro, Italy
- <sup>40</sup> Department of Medical Biotechnologies, University of Siena, Siena, Italy
- <sup>41</sup> Infectious and Tropical Diseases Unit, Azienda Ospedaliero Universitaria Senese, Siena, Italy

<sup>42</sup> Department of Informatics, Bioengineering, Robotics and System Engineering (DIBRIS), University of Genoa, Genoa, Italy

<sup>43</sup> UO Microbiologia, IRCCS Ospedale Policlinico San Martino, Genoa, Italy

**\* Corresponding author:**

Daniele Roberto Giacobbe, MD, PhD

Clinica Malattie Infettive, IRCCS Ospedale Policlinico San Martino

L.go R. Benzi, 10 – 16132 Genoa, Italy

Telephone: +39 010 555 4654; Fax: +39 010 5556712

Email address: [danieleroberto.giacobbe@unige.it](mailto:danieleroberto.giacobbe@unige.it)

## Supplementary table S1. Infections treated with empirical and targeted cefiderocol

| Variables <sup>a</sup>                                           | No. of patients | %    | 95% CI    |
|------------------------------------------------------------------|-----------------|------|-----------|
| <b>Reported indication for empirical therapy</b>                 |                 |      |           |
| Sepsis                                                           | 36/55           | 65.5 | 51.8-77.8 |
| Lower respiratory tract infection                                | 10/55           | 18.2 | 9.4-30.6  |
| Intra-abdominal infection                                        | 6/55            | 10.9 | 4.9-22.2  |
| Surgical site infection                                          | 2/55            | 3.6  | 0.7-12.1  |
| Other indication (not further specified)                         | 1/55            | 1.8  | 0.1-9.3   |
| <b>Infections treated with targeted cefiderocol <sup>b</sup></b> |                 |      |           |
| Lower respiratory tract infection                                | 63/145          | 43.4 | 35.4-51.7 |
| Bloodstream infection                                            | 56/145          | 38.6 | 30.9-46.9 |
| Urinary tract infection                                          | 7/145           | 4.8  | 2.2-9.4   |
| Lower respiratory tract infection plus bloodstream infection     | 4/145           | 2.8  | 1.0-6.7   |
| Bone and joint infection                                         | 3/145           | 2.1  | 0.6-5.9   |
| Intra-abdominal infection                                        | 3/145           | 2.1  | 0.6-5.9   |
| Skin and soft-tissue infection                                   | 3/145           | 2.1  | 0.6-5.9   |
| Bone and joint infection plus bloodstream infection              | 1/145           | 0.7  | 0.0-3.5   |
| Intra-abdominal infection plus bloodstream infection             | 1/145           | 0.7  | 0.0-3.5   |
| Skin and soft-tissue infection plus bloodstream infection        | 1/145           | 0.7  | 0.0-3.5   |

|                                                    |       |     |         |
|----------------------------------------------------|-------|-----|---------|
| Surgical site infection                            | 1/145 | 0.7 | 0.0-3.5 |
| Urinary tract infection plus bloodstream infection | 1/145 | 0.7 | 0.0-3.5 |
| Other indication (not further specified)           | 1/145 | 0.7 | 0.0-3.5 |

---

CI, confidence interval.

<sup>a</sup> Results are presented as No. of patients/Total of patients unless otherwise indicated.

<sup>b</sup> Cefiderocol therapy started after identification of the causative agent. Causative agents: *Acinetobacter baumannii* (n = 67); *Pseudomonas aeruginosa* (n = 25); *Klebsiella* spp. (n = 18); *Enterobacter* spp. (n = 7); *A. baumannii* plus *Klebsiella* spp. (n = 5); *A. baumannii* plus *P. aeruginosa* (n = 4); *Stenotrophomonas maltophilia* (n = 4); *Klebsiella* spp. plus *P. aeruginosa* (n = 3); *A. baumannii* plus *Enterobacter* spp. (n = 1); *A. baumannii* plus *Enterobacter* spp. plus *S. maltophilia* (n = 1); *A. baumannii* plus *Klebsiella* spp. plus *P. aeruginosa* (n = 1); *A. baumannii* plus *S. maltophilia* (n = 1); *Achromobacter xylosoxidans* (n = 1); *A. xylosoxidans* plus *Escherichia coli* plus *P. aeruginosa* (n = 1); *A. xylosoxidans* plus *P. aeruginosa* (n = 1); *A. xylosoxidans* plus *Elizabethkingia miricola* plus *S. maltophilia* (n = 1); *Elizabethkingia miricola* plus *S. maltophilia* (n = 1); *Enterobacter* spp. plus *P. aeruginosa* (n = 1); *Enterobacter* spp. plus *Klebsiella* spp. (n = 1); *P. aeruginosa* plus *S. maltophilia* (n = 1).

**Supplementary table S2. Demographic and clinical characteristics of adult patients treated with targeted cefiderocol and stratified according to causative agents**

| Variables*                               | Enterobacteriales infection**<br>(N=26) | <i>Acinetobacter baumannii</i> infection**<br>(N=67) | <i>Pseudomonas aeruginosa</i> infection**<br>(N=25) | MBL-producing GNB infection**, ***<br>(N = 22) |
|------------------------------------------|-----------------------------------------|------------------------------------------------------|-----------------------------------------------------|------------------------------------------------|
| <b>Demographics</b>                      |                                         |                                                      |                                                     |                                                |
| Age in years, median (IQR)               | 68 (58-74)                              | 68 (53-75)                                           | 63 (51-73)                                          | 63 (57-74)                                     |
| Male sex                                 | 7/26 (26.9%)                            | 12/67 (17.9%)                                        | 7/25 (28.0%)                                        | 6/22 (27.3%)                                   |
| <b>Comorbidities and medical history</b> |                                         |                                                      |                                                     |                                                |
| Previous hospitalization                 | 15/25 (60.0%)                           | 26/64 (40.6%)                                        | 8/25 (32.0%)                                        | 9/21 (42.9%)                                   |
| Admission from LTCF                      | 2/26 (7.7%)                             | 5/67 (7.5%)                                          | 2/25 (8.0%)                                         | 1/22 (4.6%)                                    |
| Diabetes mellitus                        | 7/25 (28.0%)                            | 17/67 (25.4%)                                        | 3/25 (12.0%)                                        | 2/22 (9.1%)                                    |
| COPD                                     | 4/25 (16.0%)                            | 4/66 (6.1%)                                          | 4/25 (16.0%)                                        | 3/22 (13.6%)                                   |
| Previous myocardial injury               | 3/25 (12.0%)                            | 16/64 (25.0%)                                        | 1/24 (4.2%)                                         | 0/22 (0.0%)                                    |
| NYHA score, median (IQR)                 | 1 (1-2)                                 | 2 (1-2)                                              | 1 (1-1)                                             | 1 (1-1)                                        |
| Chronic liver disease                    | 2/26 (7.7%)                             | 4/67 (6.0%)                                          | 2/25 (8.0%)                                         | 2/22 (9.1%)                                    |
| Chronic kidney disease                   | 6/24 (25.0%)                            | 11/67 (16.4%)                                        | 3/25 (12.0%)                                        | 4/22 (18.2%)                                   |
| Chronic intermittent hemodialysis        | 1/25 (4.0%)                             | 1/65 (1.54%)                                         | 0/25 (0.0%)                                         | 0/22 (0.0%)                                    |
| Solid neoplasm                           | 6/25 (24.0%)                            | 5/66 (7.6%)                                          | 3/25 (12.0%)                                        | 6/22 (27.3%)                                   |
| Metastatic solid neoplasm                | 1/25 (4.0%)                             | 2/65 (3.1%)                                          | 1/25 (4.0%)                                         | 2/22 (9.1%)                                    |
| Hematological malignancy                 | 5/25 (20.0%)                            | 6/67 (9.0%)                                          | 3/25 (12.0%)                                        | 6/22 (27.3%)                                   |

|                                                       |               |               |               |               |
|-------------------------------------------------------|---------------|---------------|---------------|---------------|
| Previous HSCT                                         | 1/25 (4.0%)   | 3/67 (4.5%)   | 2/25 (8.0%)   | 3/22 (13.6%)  |
| Previous SOT                                          | 0/25 (0.0%)   | 5/67 (7.5%)   | 3/25 (12.0%)  | 1/22 (4.6%)   |
| HIV infection                                         | 0/24 (0.0%)   | 1/62 (1.6%)   | 1/23 (4.4%)   | 0/21 (0.0%)   |
| Autoimmune disease                                    | 2/25 (8.0%)   | 11/67 (16.4%) | 2/25 (8.0%)   | 2/22 (9.1%)   |
| Age-adjusted Charlson Comorbidity Index, median (IQR) | 4 (3-6)       | 4 (2-6)       | 3 (2-5)       | 4 (2-6)       |
| Previous therapy with ceftiderocol                    | 0/25 (0.0%)   | 1/66 (1.6%)   | 1/25 (4.0%)   | 0/21 (0.0%)   |
| Previous antibiotic therapy other than ceftiderocol   | 16/23 (69.6%) | 36/59 (61.0%) | 17/25 (68.0%) | 17/21 (81.0%) |
| Previous piperacillin/tazobactam                      | 7/23 (30.4%)  | 26/59 (44.1%) | 10/25 (40.0%) | 7/21 (33.3%)  |
| Previous ceftazidime/cefepime                         | 1/23 (4.4%)   | 2/59 (3.4%)   | 1/25 (4.0%)   | 1/21 (4.8%)   |
| Previous ceftolozane/tazobactam                       | 2/23 (8.7%)   | 0/59 (0.0%)   | 4/25 (16.0%)  | 5/21 (23.8%)  |
| Previous carbapenems                                  | 7/23 (30.4%)  | 14/59 (23.7%) | 6/25 (24.0%)  | 5/21 (23.8%)  |
| Previous ceftazidime/avibactam                        | 4/23 (17.4%)  | 2/59 (3.4%)   | 2/25 (8.0%)   | 3/21 (14.3%)  |
| Previous meropenem/vaborbactam                        | 1/23 (4.4%)   | 0/59 (0.0%)   | 0/25 (0.0%)   | 0/21 (0.0%)   |
| Previous imipenem/relebactam                          | 0/23 (0.0%)   | 0/59 (0.0%)   | 0/25 (0.0%)   | 0/21 (0.0%)   |
| Previous colistin                                     | 0/23 (0.0%)   | 1/59 (1.7%)   | 0/25 (0.0%)   | 0/21 (0.0%)   |
| Previous chemotherapy                                 | 5/26 (19.2%)  | 3/65 (4.6%)   | 4/25 (16.0%)  | 8/22 (36.4%)  |
| Previous steroid therapy                              | 8/25 (32.0%)  | 22/57 (38.6%) | 10/25 (40.0%) | 10/22 (45.5%) |
| Previous therapy with immunosuppressants              | 3/25 (12.0%)  | 8/64 (12.5%)  | 5/25 (20.0%)  | 5/22 (22.7%)  |
| Previous major surgery                                | 11/26 (42.3%) | 21/67 (31.3%) | 9/25 (36.0%)  | 8/22 (36.4%)  |
| Previous isolation of CR-GNB                          | 9/24 (37.5%)  | 15/59 (25.4%) | 5/24 (20.8%)  | 5/21 (23.8%)  |

|                                                                     |                   |                    |                    |                    |
|---------------------------------------------------------------------|-------------------|--------------------|--------------------|--------------------|
| Previous CRE                                                        | 9/24 (37.5%)      | 7/59 (11.9%)       | 1/24 (4.2%)        | 4/21 (19.1%)       |
| Previous CRPA                                                       | 0/24 (0.0%)       | 0/59 (0.0%)        | 4/24 (16.7%)       | 1/21 (4.8%)        |
| Previous CRAB                                                       | 0/24 (0.0%)       | 9/59 (15.3%)       | 0/24 (0.0%)        | 0/21 (0.0%)        |
| Previous MBL-producing CR-GNB                                       | 5/24 (20.8%)      | 1/59 (1.7%)        | 3/24 (12.5%)       | 4/21 (19.1%)       |
| <b>Variables at cefiderocol initiation</b>                          |                   |                    |                    |                    |
| Days from admission to cefiderocol initiation, median (IQR)         | 19 (10-31)        | 19 (10-35)         | 25 (9-42)          | 12 (4-38)          |
| ICU stay                                                            | 13/26 (50.0%)     | 35/67 (52.2%)      | 14/25 (56.0%)      | 10/22 (45.5%)      |
| SOFA score, median (IQR)                                            | 4 (2-5)           | 5 (3-8)            | 4 (2-5)            | 4 (2-4)            |
| Presence of CVC                                                     | 14/23 (60.9%)     | 43/64 (67.2%)      | 18 (72.0%)         | 15/21 (71.4%)      |
| Presence of urinary catheter                                        | 19/25 (76.0%)     | 49/64 (76.6%)      | 21/24 (87.5%)      | 16/21 (76.2%)      |
| Presence of septic shock                                            | 4/26 (15.4%)      | 20/67 (29.9%)      | 4/25 (16.0%)       | 3/22 (13.6%)       |
| Presence of ARDS                                                    | 1/24 (4.2%)       | 6/64 (9.4%)        | 5/25 (20.0%)       | 3/21 (14.3%)       |
| Presence of AKI                                                     | 10/25 (40.0%)     | 24/67 (35.8%)      | 10/25 (40.0%)      | 10/22 (45.5%)      |
| Concomitant COVID-19                                                | 0/26 (0.0%)       | 6/67 (9.0%)        | 1/24 (4.2%)        | 0/22 (0.0%)        |
| Total parenteral nutrition                                          | 7/25 (28.0%)      | 16/66 (24.2%)      | 6/21 (28.6%)       | 6/19 (31.6%)       |
| Neutropenia                                                         | 1/26 (3.9%)       | 2/67 (3.0%)        | 1/25 (4.0%)        | 1/22 (4.6%)        |
| CRRT                                                                | 6/26 (23.1%)      | 5/65 (7.7%)        | 3/25 (12.0%)       | 3/22 (13.6%)       |
| ECMO                                                                | 0/25 (0.0%)       | 2/66 (3.0%)        | 0/25 (0.0%)        | 0/22 (0.0%)        |
| White blood cell x 10 <sup>-3</sup> /mm <sup>3</sup> , median (IQR) | 9.66 (4.50-19.36) | 10.00 (6.59-13.48) | 21.01 (9.42-15.10) | 12.00 (5.47-17.80) |
| Serum C-reactive protein in mg/L, median (IQR)                      | 33.4 (16.8-90.8)  | 69.8 (11.2-134.8)  | 98.1 (32.6-155.4)  | 84.0 (23.7-127.0)  |



|                                            |               |               |               |               |
|--------------------------------------------|---------------|---------------|---------------|---------------|
| Serum procalcitonin in ng/mL, median (IQR) | 2.1 (0.8-5.1) | 0.9 (0.4-5.2) | 0.9 (0.2-1.8) | 1.4 (0.3-2.9) |
|--------------------------------------------|---------------|---------------|---------------|---------------|

AKI, acute kidney injury; ARDS, acute respiratory distress syndrome; CI, confidence interval; COPD, chronic obstructive pulmonary disease; COVID-19, coronavirus disease 2019; CR-GNB, carbapenem-resistant gram-negative bacteria; CRAB, carbapenem-resistant *Acinetobacter baumannii*; CRE, carbapenem-resistant Enterobacterales; CRPA, carbapenem-resistant *Pseudomonas aeruginosa*; CRRT, continuous renal replacement therapy; CVC, central venous catheter; ECMO, extracorporeal membrane oxygenation; HIV, human immunodeficiency virus; HSCT, hematopoietic stem cell transplantation; ICU, intensive care unit; IQR, interquartile range; MBL, metallo  $\beta$ -lactamases; NYHA, New York Heart Association; LTCF, long-term care facility; SOFA, sequential organ failure assessment; SOT, solid organ transplantation.

\* Results are presented as No. of patients/Total of patients unless otherwise indicated.

\*\* Infection by only one Gram negative genus (with the exception of Enterobacterales infection, for which concomitant infection by more than one member of the Enterobacterales order was also considered).

\*\*\* Not mutually exclusive with the other subgroups

**Supplementary table S3. Univariable analysis of factors associated with use of cefiderocol in combination with other anti-CR-GNB agents <sup>a</sup>**

| <b>Variables <sup>b</sup></b>            | <b>OR (95% CI)</b> | <b>P</b>     |
|------------------------------------------|--------------------|--------------|
| <b>Demographics</b>                      |                    |              |
| Age in years                             | 0.99 (0.97-1.00)   | 0.102        |
| Female sex                               | 1.28 (0.67-2.45)   | 0.459        |
| <b>Comorbidities and medical history</b> |                    |              |
| Previous hospitalization                 | 1.25 (0.71-2.19)   | 0.435        |
| Admission from LTCF                      | 2.66 (0.80-8.81)   | 0.109        |
| Diabetes mellitus                        | 1.26 (0.61-2.62)   | 0.534        |
| COPD                                     | 0.47 (0.19-1.15)   | 0.097        |
| Previous myocardial injury               | 1.31 (0.58-2.95)   | 0.516        |
| NYHA score                               | 1.04 (0.72-1.50)   | 0.851        |
| Chronic liver disease                    | 0.62 (0.20-1.96)   | 0.414        |
| Chronic kidney disease                   | 0.37 (0.17-0.83)   | <b>0.016</b> |
| Chronic intermittent hemodialysis        | 0.55 (0.12-2.59)   | 0.451        |
| Solid neoplasm                           | 0.55 (0.24-1.23)   | 0.143        |
| Metastatic solid neoplasm                | 0.41 (0.10-1.65)   | 0.211        |
| Hematological malignancy                 | 1.31 (0.59-2.88)   | 0.510        |
| Previous HSCT                            | 8.79 (1.08-71.66)  | <b>0.042</b> |

|                                                    |                   |       |
|----------------------------------------------------|-------------------|-------|
| Previous SOT                                       | 0.71 (0.22-2.33)  | 0.577 |
| HIV infection                                      | 0.77 (0.08-7.64)  | 0.823 |
| Autoimmune disease                                 | 0.92 (0.37-2.27)  | 0.856 |
| Age-adjusted Charlson Comorbidity Index            | 0.91 (0.83-1.00)  | 0.059 |
| Previous therapy with cefiderocol                  | 1.79 (0.32-10.02) | 0.510 |
| Previous antibiotic therapy other than cefiderocol | 0.90 (0.48-1.68)  | 0.749 |
| Previous piperacillin/tazobactam                   | 0.62 (0.35-1.12)  | 0.115 |
| Previous ceftazidime/cefepime                      | 0.84 (0.27-2.63)  | 0.764 |
| Previous ceftolozane/tazobactam                    | 1.91 (0.70-5.18)  | 0.203 |
| Previous carbapenems                               | 0.82 (0.44-1.54)  | 0.543 |
| Previous ceftazidime/avibactam                     | 2.32 (0.77-6.94)  | 0.133 |
| Previous meropenem/vaborbactam*                    | -                 | -     |
| Previous imipenem/relebactam**                     | -                 | -     |
| Previous polymyxins                                | 3.68 (0.39-37.76) | 0.255 |
| Previous chemotherapy                              | 1.04 (0.44-2.46)  | 0.925 |
| Previous steroid therapy                           | 0.88 (0.49-1.59)  | 0.674 |
| Previous therapy with immunosuppressants           | 0.67 (0.30-1.53)  | 0.345 |
| Previous major surgery                             | 1.03 (0.58-1.83)  | 0.912 |
| Previous isolation of CR-GNB                       | 1.08 (0.61-1.91)  | 0.797 |
| Previous CRE                                       | 0.78 (0.40-1.55)  | 0.471 |
| Previous CRPA                                      | 1.09 (0.30-4.00)  | 0.894 |

|                                                      |                  |              |
|------------------------------------------------------|------------------|--------------|
| Previous CRAB                                        | 2.08 (0.91-4.77) | 0.083        |
| Previous MBL-producing CR-GNB                        | 0.67 (0.26-1.72) | 0.411        |
| <b>Variables at cefiderocol initiation</b>           |                  |              |
| Days from admission to cefiderocol initiation        | 1.00 (0.99-1.01) | 0.730        |
| ICU stay                                             | 1.69 (0.97-2.96) | 0.066        |
| SOFA score                                           | 1.03 (0.97-1.10) | 0.350        |
| Presence of CVC                                      | 1.56 (0.83-2.94) | 0.166        |
| Presence of urinary catheter                         | 1.66 (0.82-3.38) | 0.160        |
| Presence of septic shock                             | 2.02 (1.05-3.89) | <b>0.035</b> |
| Presence of ARDS                                     | 0.75 (0.30-1.88) | 0.543        |
| Presence of AKI                                      | 0.83 (0.46-1.48) | 0.522        |
| Concomitant COVID-19                                 | 0.39 (0.13-1.16) | 0.089        |
| Total parenteral nutrition                           | 1.05 (0.57-1.94) | 0.880        |
| Neutropenia                                          | 1.57 (0.43-5.72) | 0.499        |
| CRRT                                                 | 1.02 (0.45-2.33) | 0.956        |
| ECMO                                                 | 0.67 (0.11-4.12) | 0.669        |
| White blood cell x 10 <sup>-3</sup> /mm <sup>3</sup> | 1.01 (0.97-1.04) | 0.772        |
| Serum C-reactive protein in mg/L                     | 1.00 (1.00-1.00) | 0.328        |
| Serum procalcitonin in ng/mL                         | 1.00 (0.99-1.01) | 0.950        |
| <b>Type of therapy</b>                               |                  |              |
| Targeted therapy (vs. empirical therapy as ref.)     | 1.53 (0.82-2.87) | 0.182        |

|                                                                                 |                  |       |
|---------------------------------------------------------------------------------|------------------|-------|
| Targeted therapy for <i>Enterobacterales</i> infection <sup>c</sup>             | 0.86 (0.38-1.96) | 0.715 |
| Targeted therapy for <i>Pseudomonas aeruginosa</i> infection <sup>c</sup>       | 0.78 (0.33-1.81) | 0.557 |
| Targeted therapy for <i>Acinetobacter baumannii</i> infection <sup>c</sup>      | 1.55 (0.86-2.79) | 0.149 |
| Targeted therapy for <i>Stenotrophomonas maltophilia</i> infection <sup>c</sup> | 0.33 (0.03-3.26) | 0.345 |
| Targeted therapy for MBL-producing Gram-negative infection <sup>c</sup>         | 0.68 (0.28-1.66) | 0.395 |
| <b>Indication <sup>d</sup></b>                                                  |                  |       |
| Sepsis/bloodstream infection                                                    | 0.88 (0.51-1.54) | 0.662 |
| Lower respiratory tract infection                                               | 1.52 (0.85-2.72) | 0.154 |
| Intra-abdominal infection                                                       | 0.50 (0.12-2.04) | 0.330 |
| Urinary tract infection                                                         | 0.16 (0.02-1.37) | 0.094 |
| Other indication                                                                | 1.24 (0.37-4.20) | 0.732 |
| More than one indication                                                        | 1.02 (0.25-4.20) | 0.977 |

Analyses conducted after multiple imputation (see study methods). AKI, acute kidney injury; ARDS, acute respiratory distress syndrome; CI, confidence interval; COPD, chronic obstructive pulmonary disease; COVID-19, coronavirus disease 2019; CR-GNB, carbapenem-resistant gram-negative bacteria; CRAB, carbapenem-resistant *Acinetobacter baumannii*; CRE, carbapenem-resistant Enterobacterales; CRPA, carbapenem-resistant *Pseudomonas aeruginosa*; CRRT, continuous renal replacement therapy; CVC, central venous catheter; ECMO, extracorporeal membrane oxygenation; HIV, human immunodeficiency virus; HSCT, hematopoietic stem cell transplantation; ICU, intensive care unit; IQR, interquartile range; MBL, metallo  $\beta$ -lactamases; NYHA, New York Heart Association; LTCF, long-term care facility; SOFA, sequential organ failure assessment; SOT, solid organ transplantation.

\* Algorithm does not converge due to too few cases.

\*\* No cases.

<sup>a</sup> Anti-CR-GNB combination was defined as treatment with cefiderocol in combination with at least one of the following agents: aminoglycosides; fosfomycin; tigecycline (with the exception of targeted therapy of *P. aeruginosa* infections); polymyxins; sulbactam or ampicillin/sulbactam (as empirical treatment of as targeted therapy for *A. baumannii* infections).

<sup>b</sup> Results are presented as No. of patients (%) unless otherwise indicated.

<sup>c</sup> Infection by only one Gram negative genus (with the exception of Enterobacterales infection, for which concomitant infection by more than one member of the Enterobacterales order was also considered).

<sup>d</sup> Mutually exclusive.

**Supplementary table S4. Clinical outcomes in patients receiving targeted cefiderocol therapy**

| <b>Infection<sup>a</sup></b>                                   | <b>7-day<br/>clinical<br/>cure</b> | <b>14-day<br/>clinical<br/>cure</b> | <b>28-day<br/>clinical<br/>cure</b> | <b>Adjusted 28-day<br/>clinical<br/>Cure<sup>b</sup></b> |
|----------------------------------------------------------------|------------------------------------|-------------------------------------|-------------------------------------|----------------------------------------------------------|
| <b>Enterobacterales infection<sup>c,e</sup></b>                | 17/26 (65)                         | 18/25 (72)                          | 17/23 (74)                          | 20/26 (77)                                               |
| Cefiderocol monotherapy                                        | 11/14 (79)                         | 11/13 (85)                          | 10/12 (83)                          | 12/14 (86)                                               |
| Combination therapy <sup>d</sup>                               | 6/12 (50)                          | 7/12 (58)                           | 7/11 (64)                           | 8/12 (67)                                                |
| <b><i>Pseudomonas aeruginosa</i> infection<sup>c,f</sup></b>   | 21/25 (84)                         | 20/24 (83)                          | 19/23 (83)                          | 21/25 (84)                                               |
| Cefiderocol monotherapy                                        | 12/14 (86)                         | 11/13 (85)                          | 10/12 (83)                          | 12/14 (86)                                               |
| Combination therapy <sup>d</sup>                               | 9/11 (82)                          | 9/11 (82)                           | 9/11 (82)                           | 9/11 (82)                                                |
| <b><i>Acinetobacter baumannii</i> infection<sup>c,g</sup></b>  | 35/65 (54)                         | 32/61 (52)                          | 25/55 (45)                          | 35/65 (54)                                               |
| Cefiderocol monotherapy                                        | 17/29 (59)                         | 15/28 (54)                          | 15/27 (56)                          | 17/29 (59)                                               |
| Combination therapy <sup>d</sup>                               | 18/36 (50)                         | 17/33 (52)                          | 10/28 (36)                          | 18/36 (50)                                               |
| <b>MBL-producing Gram-negative infection<sup>c,h,i,l</sup></b> | 16/22 (73)                         | 17/22 (77)                          | 17/22 (77)                          | 17/22 (77)                                               |
| Cefiderocol monotherapy                                        | 10/13 (77)                         | 11/13 (85)                          | 11/13 (85)                          | 11/13 (85)                                               |
| Combination therapy <sup>d</sup>                               | 6/9 (67)                           | 6/9 (67)                            | 6/9 (67)                            | 6/9 (67)                                                 |

MBL, metallo- $\beta$ -lactamases.

<sup>a</sup> Results are presented as No. of patients/Total of patients (%). Discharged patients excluded from denominator with the exception of the sensitivity analysis for adjusted 28-day mortality (for details, see methods). Missing information excluded from denominator.

<sup>b</sup> Sensitivity analysis considering also discharged patients as clinically cured at day 28.

<sup>c</sup> Infection by only one Gram-negative genus (with the exception of Enterobacterales infection, for which concomitant infection by more than one member of the Enterobacterales order was also considered).

<sup>d</sup> Anti-CR-GNB combination was defined as treatment with cefiderocol in combination with at least one of the following agents: aminoglycosides; fosfomycin; tigecycline (with the exception of targeted therapy of *P. aeruginosa* infections); polymyxins; sulbactam or ampicillin/sulbactam (as empirical treatment of as targeted therapy for *A. baumannii* infections).

<sup>e</sup> Site/s of Enterobacterales infection: bloodstream infection (n = 12); lower respiratory tract infection (n = 7); urinary tract infection (n = 2); skin and soft tissue infection (n = 1); intra-abdominal infection (n = 1); intra-abdominal infection plus bloodstream infection (n = 1); lower respiratory tract infection plus bloodstream infection (n = 1); urinary tract infection plus bloodstream infection (n = 1).

<sup>f</sup> Site/s of *P. aeruginosa* infection (n = 25): lower respiratory tract infection (n = 12); bloodstream infection (n = 6); urinary tract infection (n = 2); bone and joint infection plus bloodstream infection (n = 1); intra-abdominal infection (n = 1); lower respiratory tract infection plus bloodstream infection (n = 1); skin and soft tissue infection (n = 1); skin and soft tissue infection plus bloodstream infection (n = 1).

<sup>g</sup> Site/s of *A. baumannii* infection (n = 67): lower respiratory tract infection (n = 30); bloodstream infection (n = 29); bone and joint infection (n = 2); urinary tract infection (n = 2); intra-abdominal infection (n = 1); lower respiratory tract infection plus bloodstream infection (n = 1); skin and soft tissue infection (n = 1); site/s not reported (n = 1).

<sup>h</sup> Site/s of MBL-producing Gram-negative infection (n = 22): lower respiratory tract infection (n = 8); bloodstream infection (n = 5); urinary tract infection (n = 3); intra-abdominal infection (n = 2); skin and soft tissue infection (n = 2); lower respiratory tract infection plus bloodstream infection (n = 1); skin and soft tissue infection plus bloodstream infection (n = 1).

<sup>i</sup> Type of MBL enzyme (n = 20): NDM (n = 12); VIM (n = 19); NDM (n = 3).

<sup>l</sup> Type of MBL-producing causative agent: *P. aeruginosa* (n = 12); Enterobacterales (n = 10).
